# Supplementary material for: Comparative Analysis of the Bacterial and Fungal Communities in the Gut and the Crop of Aedes albopictus Mosquitoes: A Preliminary Study
Source: Pathogens. 2020 Aug 1;9(8):628. doi: 10.3390/pathogens9080628 (PMC7459933; doi:10.3390/pathogens9080628)
Supplement: Supplementary file 1 [file pathogens-09-00628-s001.xlsx]

## Sheet: Bacteria
Common or specific OTUs	Phylum	Family	Genus
Common OTUs between all samples	Actinobacteria	Microbacteriaceae	Rathayibacter
	Bacteroidetes	Dysgonomonadaceae	Dysgonomonas
	Proteobacteria	Rhodobacteraceae	Paracoccus
	Proteobacteria	Halomonadaceae	Halomonas
	Proteobacteria	Moraxellaceae	Alkanindiges
	Proteobacteria	Sphingomonadaceae	Sphingomonas
	Firmicutes	Ruminococcaceae	unclassified
	Bacteroidetes	OPB56	fa_OPB56
	Actinobacteria	Micrococcaceae	Rothia
	Proteobacteria	Sphingomonadaceae	Sphingomonas
	Bacteroidetes	Weeksellaceae	Chryseobacterium
	Actinobacteria	Corynebacteriaceae	Corynebacterium
	Proteobacteria	Anaplasmataceae	Wolbachia
	Proteobacteria	Sphingomonadaceae	Sphingomonas
	Proteobacteria	Sphingomonadaceae	Sphingomonas
	Actinobacteria	Solirubrobacteraceae	Solirubrobacter
	Proteobacteria	Halomonadaceae	Halomonas
	Bacteroidetes	Flavobacteriaceae	Myroides
	Actinobacteria	Geodermatophilaceae	Blastococcus
	Bacteroidetes	Weeksellaceae	Chryseobacterium
	Proteobacteria	Burkholderiaceae	Massilia
	Firmicutes	Paenibacillaceae	Paenibacillus
	Proteobacteria	Rhizobiaceae	Pseudochrobactrum
	Proteobacteria	Marinobacteraceae	Marinobacter
	Actinobacteria	Microbacteriaceae	Leucobacter
	Actinobacteria	Corynebacteriaceae	Corynebacterium
	Proteobacteria	Caulobacteraceae	Brevundimonas
	Firmicutes	Enterococcaceae	Enterococcus
	Proteobacteria	Beijerinckiaceae	Methylobacterium
	Proteobacteria	Burkholderiaceae	Diaphorobacter
	Firmicutes	Paenibacillaceae	Paenibacillus
	Bacteroidetes	Weeksellaceae	Cloacibacterium
	Proteobacteria	Burkholderiaceae	unclassified
	Actinobacteria	Microbacteriaceae	Microbacterium
	Proteobacteria	Burkholderiaceae	Ralstonia
	Proteobacteria	Burkholderiaceae	unclassified
	Proteobacteria	Rhodobacteraceae	Paracoccus
	Proteobacteria	Rhodobacteraceae	unclassified
	Firmicutes	Thermoanaerobacteraceae	Moorella
	Firmicutes	unclassified	unclassified
	Bacteroidetes	Flavobacteriaceae	Flavobacterium
	Proteobacteria	Burkholderiaceae	unclassified
	Proteobacteria	Enterobacteriaceae	unclassified
	Actinobacteria	Micrococcaceae	Arthrobacter
	Firmicutes	unclassified	unclassified
	Actinobacteria	Microbacteriaceae	Curtobacterium
	Bacteroidetes	Sphingobacteriaceae	Pedobacter
	Firmicutes	unclassified	unclassified
	Firmicutes	Carnobacteriaceae	Granulicatella
	Actinobacteria	Propionibacteriaceae	Cutibacterium
	Proteobacteria	Burkholderiaceae	Limnobacter
	Actinobacteria	Cellulomonadaceae	Oerskovia
	Proteobacteria	Pasteurellaceae	Haemophilus
	Proteobacteria	Rhodobacteraceae	Paracoccus
	Actinobacteria	Nocardioidaceae	Nocardioides
	Actinobacteria	Corynebacteriaceae	Corynebacterium
	Proteobacteria	Moraxellaceae	unclassified
	Proteobacteria	Mitochondria	Mitochondria
	Actinobacteria	Microbacteriaceae	unclassified
	Bacteroidetes	Sphingobacteriaceae	Pedobacter
	Proteobacteria	Burkholderiaceae	Comamonas
Common OTUs between female crops, female guts and male crops	Actinobacteria	Dermacoccaceae	Dermacoccus
	Proteobacteria	Burkholderiaceae	unclassified
	Firmicutes	Lachnospiraceae	Lachnospiraceae_ND3007group
	Proteobacteria	Rhodobacteraceae	Rubellimicrobium
	Proteobacteria	Burkholderiaceae	unclassified
	Proteobacteria	Moraxellaceae	Enhydrobacter
	Firmicutes	Staphylococcaceae	Staphylococcus
	Actinobacteria	Propionibacteriaceae	Friedmanniella
	Proteobacteria	Rhodobacteraceae	Rubellimicrobium
	Proteobacteria	Sphingomonadaceae	Sphingomonas
	Firmicutes	Ruminococcaceae	Ruminococcaceae_ UCG-005
	Actinobacteria	Pseudonocardiaceae	Pseudonocardia
	Actinobacteria	Corynebacteriaceae	Corynebacterium
Common OTUs between crops and guts of males	Proteobacteria	Burkholderiaceae	Lautropia
	Proteobacteria	Sphingomonadaceae	unclassified
	Proteobacteria	Sphingomonadaceae	unclassified
	Actinobacteria	Nocardioidaceae	Nocardioides
	Proteobacteria	Anaplasmataceae	Wolbachia
	Proteobacteria	Sphingomonadaceae	Sphingomonas
	Proteobacteria	Burkholderiaceae	Polaromonas
	Proteobacteria	Nitrosomonadaceae	DSSD61
	Actinobacteria	Mycobacteriaceae	Mycobacterium
	Actinobacteria	Corynebacteriaceae	Corynebacterium
	Bacteroidetes	Dysgonomonadaceae	Fermentimonas
	Proteobacteria	Aeromonadaceae	Aeromonas
	Proteobacteria	Idiomarinaceae	Aliidiomarina
	Proteobacteria	Devosiaceae	Devosia
	Proteobacteria	Caulobacteraceae	Brevundimonas
	Actinobacteria	Nocardioidaceae	Nocardioides
	Bacteroidetes	Hymenobacteraceae	Hymenobacter
	Proteobacteria	Pseudomonadaceae	Pseudomonas
	Bacteroidetes	Flavobacteriaceae	Flavobacterium
	Proteobacteria	Caulobacteraceae	Brevundimonas
Common OTUs between guts of females and males	Actinobacteria	Microbacteriaceae	Clavibacter
	Proteobacteria	Aeromonadaceae	Aeromonas
	Bacteroidetes	Sphingobacteriaceae	Sphingobacterium
	Proteobacteria	Acetobacteraceae	unclassified
	Actinobacteria	Micromonosporaceae	unclassified
	Actinobacteria	Microbacteriaceae	Leucobacter
	Proteobacteria	Rhizobiaceae	Phyllobacterium
	Bacteroidetes	Sphingobacteriaceae	Sphingobacterium
	Proteobacteria	Xanthobacteraceae	Nitrobacter
	Actinobacteria	Brevibacteriaceae	Brevibacterium
	Actinobacteria	Sanguibacteraceae	Sanguibacter
	Actinobacteria	Propionibacteriaceae	Micropruina
	Actinobacteria	Solirubrobacteraceae	Solirubrobacter
	Proteobacteria	Rhizobiaceae	Falsochrobactrum
	Bacteroidetes	Flavobacteriaceae	Flavobacterium
	Proteobacteria	Moraxellaceae	Alkanindiges
	Bacteroidetes	Dysgonomonadaceae	Dysgonomonas
	Proteobacteria	Beijerinckiaceae	1174-901-12
	Bacteroidetes	Weeksellaceae	Chryseobacterium
	Actinobacteria	Actinomycetaceae	Actinomyces
	Proteobacteria	Enterobacteriaceae	unclassified
	Proteobacteria	Rhodanobacteraceae	Luteibacter
	Bacteroidetes	Weeksellaceae	Elizabethkingia
	Proteobacteria	Neisseriaceae	Neisseria
	Actinobacteria	Nocardioidaceae	Marmoricola
	Proteobacteria	Sphingomonadaceae	Sphingomonas
	Actinobacteria	Propionibacteriaceae	unclassified
	Proteobacteria	Caulobacteraceae	Phenylobacterium
	Firmicutes	Bacillaceae	Bacillus
Common OTUs between crops and guts of males	Proteobacteria	Marinobacteraceae	Marinobacter
	Proteobacteria	Sphingomonadaceae	Sphingomonas
	Firmicutes	Aerococcaceae	Globicatella
	Proteobacteria	Xanthomonadaceae	unclassified
	Actinobacteria	Microbacteriaceae	Leucobacter
	Proteobacteria	Burkholderiaceae	Pseudacidovorax
	Proteobacteria	Burkholderiaceae	Massilia
	Actinobacteria	Actinomycetaceae	Actinomyces
	Proteobacteria	Xanthomonadaceae	unclassified
	Actinobacteria	Microbacteriaceae	Microbacterium
	Actinobacteria	Pseudonocardiaceae	Pseudonocardia
	Firmicutes	Streptococcaceae	Streptococcus
	Actinobacteria	Microbacteriaceae	Agreia
	Firmicutes	unclassified	unclassified
Common OTUs between crops of females and males	Bacteroidetes	OPB56	fa_OPB56
	Proteobacteria	Sandaracinaceae	uncultured
	Actinobacteria	Dermabacteraceae	Brachybacterium
	Actinobacteria	Intrasporangiaceae	Janibacter
	Bacteroidetes	Chitinophagaceae	Flavisolibacter
	Actinobacteria	Actinomycetaceae	Actinomyces
	Proteobacteria	Sphingomonadaceae	unclassified
	Proteobacteria	Rhizobiaceae	Allorhizobium-Neorhizobium-Pararhizobium-Rhizobium
	Actinobacteria	Actinomycetaceae	Flaviflexus
	Proteobacteria	Burkholderiaceae	Massilia
	Bacteroidetes	Weeksellaceae	Chryseobacterium
	Actinobacteria	Pseudonocardiaceae	Saccharopolyspora
	Proteobacteria	Burkholderiaceae	Schlegelella
	Actinobacteria	Intrasporangiaceae	Knoellia
	Bacteroidetes	Flavobacteriaceae	unclassified
Common OTUs between crops and guts of females	Bacteroidetes	Chitinophagaceae	Lacibacter
	Firmicutes	Peptostreptococcaceae	Romboutsia
	Proteobacteria	Sphingomonadaceae	Novosphingobium
	Actinobacteria	Dermabacteraceae	Brachybacterium
	Proteobacteria	Burkholderiaceae	Massilia
	Proteobacteria	Sphingomonadaceae	Sphingomonas
	unclassified	unclassified	unclassified
	Bacteroidetes	Flavobacteriaceae	unclassified
	Proteobacteria	Haliangiaceae	Haliangium
	Actinobacteria	Nocardioidaceae	unclassified
	Bacteroidetes	Weeksellaceae	unclassified
	Actinobacteria	Corynebacteriaceae	Corynebacterium
	Firmicutes	Clostridiaceae	unclassified
	Proteobacteria	Sphingomonadaceae	Sphingomonas
	Proteobacteria	Acetobacteraceae	Roseomonas
	Bacteroidetes	Sphingobacteriaceae	Pedobacter
	Firmicutes	unclassified	unclassified
	Actinobacteria	Microbacteriaceae	Frondihabitans
	Actinobacteria	Brevibacteriaceae	Brevibacterium
	Firmicutes	Veillonellaceae	Sporomusa
	Bacteroidetes	Chitinophagaceae	Terrimonas
	Bacteroidetes	Weeksellaceae	unclassified
	Bacteroidetes	Weeksellaceae	Chryseobacterium
Common OTUs between female crops and male guts	Proteobacteria	TRA3-20	TRA3-20
	Proteobacteria	Hyphomicrobiaceae	Hyphomicrobium
	Proteobacteria	Bacteriovoracaceae	Bacteriovorax
	Bacteroidetes	Hymenobacteraceae	Hymenobacter
	Bacteroidetes	Weeksellaceae	Chryseobacterium
	Actinobacteria	Corynebacteriaceae	unclassified
	Proteobacteria	Sphingomonadaceae	Sphingomonas
	Proteobacteria	Beijerinckiaceae	Methylobacterium
	Actinobacteria	Nocardioidaceae	Nocardioides
	Actinobacteria	Gaiellaceae	Gaiella
	Bacteroidetes	Sphingobacteriaceae	unclassified
	Chlamydiae	Parachlamydiaceae	Candidatus_Rubidus
	Bacteroidetes	Hymenobacteraceae	Hymenobacter
	Actinobacteria	Nocardioidaceae	Marmoricola
	Actinobacteria	Micrococcaceae	Kocuria
	Proteobacteria	Beijerinckiaceae	Methylobacterium
	Proteobacteria	Halomonadaceae	Halomonas
	Bacteroidetes	Sphingobacteriaceae	Pedobacter
	Firmicutes	Streptococcaceae	Streptococcus
Common OTUs between female guts and male crops	Proteobacteria	Burkholderiaceae	Massilia
	unclassified	unclassified	unclassified
	Firmicutes	Bacillaceae	Bacillus
	Bacteroidetes	unclassified	unclassified
	Actinobacteria	Corynebacteriaceae	Corynebacterium
	Proteobacteria	Rhodobacteraceae	unclassified
	Proteobacteria	Sphingomonadaceae	Ellin6055
	Actinobacteria	67-14	67-14
	Actinobacteria	Microbacteriaceae	unclassified
	Proteobacteria	Moraxellaceae	Acinetobacter
	Bacteroidetes	Flavobacteriaceae	unclassified
	Firmicutes	Paenibacillaceae	Paenibacillus
	Proteobacteria	Burkholderiaceae	Pelomonas
	Bacteroidetes	Weeksellaceae	Chryseobacterium
	Proteobacteria	Burkholderiaceae	unclassified
	Actinobacteria	Micromonosporaceae	Micromonospora
	Firmicutes	unclassified	unclassified
	Proteobacteria	Rhodobacteraceae	Haematobacter
	Firmicutes	Bacillaceae	Bacillus
	Actinobacteria	Micrococcaceae	Pseudarthrobacter
	Verrucomicrobia	Pedosphaeraceae	unclassified
	Proteobacteria	Burkholderiaceae	Massilia
	Firmicutes	unclassified	unclassified
	Proteobacteria	Rhizobiaceae	Mesorhizobium
	Bacteroidetes	Chitinophagaceae	Ferruginibacter
	Firmicutes	unclassified	unclassified
Common OTUs between crops and guts of males	Proteobacteria	Burkholderiaceae	Tepidimonas
	Proteobacteria	Moraxellaceae	Acinetobacter
	Proteobacteria	BIrii41	BIrii41
	Actinobacteria	Nakamurellaceae	Nakamurella
	Firmicutes	Lachnospiraceae	Anaerostipes
	Proteobacteria	Enterobacteriaceae	Rahnella
	Proteobacteria	Moraxellaceae	Moraxellaceae
	Actinobacteria	Intrasporangiaceae	unclassified
	Proteobacteria	Moraxellaceae	Psychrobacter
	Actinobacteria	Nocardiopsaceae	Nocardiopsis
	Proteobacteria	Pasteurellaceae	unclassified
	Proteobacteria	Pasteurellaceae	Haemophilus
	Actinobacteria	Corynebacteriaceae	Corynebacterium
	Proteobacteria	Burkholderiaceae	unclassified
	Proteobacteria	Rhizobiaceae	Allorhizobium-Neorhizobium-Pararhizobium-Rhizobium
	Firmicutes	Bacillaceae	Bacillus
	Bacteroidetes	Microscillaceae	Chryseolinea
	Proteobacteria	Beijerinckiaceae	Bosea
	Proteobacteria	Beijerinckiaceae	Microvirga
	Firmicutes	Streptococcaceae	Streptococcus
	Proteobacteria	Sphingomonadaceae	Novosphingobium
	Actinobacteria	Micrococcaceae	Glutamicibacter
	Actinobacteria	Micromonosporaceae	unclassified
Common OTUs between guts of females and males	Firmicutes	FamilyXI	Finegoldia
	Bacteroidetes	Spirosomaceae	Spirosoma
	Proteobacteria	Pseudomonadaceae	unclassified
	Firmicutes	Lactobacillaceae	Lactobacillus
	Proteobacteria	Moraxellaceae	Acinetobacter
	Proteobacteria	Rhizobiaceae	Aminobacter
	Firmicutes	Paenibacillaceae	Brevibacillus
	Firmicutes	Carnobacteriaceae	Jeotgalibaca
	Proteobacteria	Reyranellaceae	Reyranella
	Proteobacteria	Blfdi19	Blfdi19
	Proteobacteria	Hyphomicrobiaceae	uncultured
	Firmicutes	Peptococcaceae	Desulfotomaculum
	Proteobacteria	Rhizobiaceae	unclassified
	Bacteroidetes	Chitinophagaceae	unclassified
	Bacteroidetes	Flavobacteriaceae	Flavobacterium
	Proteobacteria	Neisseriaceae	Neisseria
	Firmicutes	FamilyXI	Anaerococcus
	Bacteroidetes	Weeksellaceae	unclassified
	Proteobacteria	Beijerinckiaceae	Bosea
	Actinobacteria	Corynebacteriaceae	Corynebacterium
	Proteobacteria	Rhodobacteraceae	Rubellimicrobium
	Firmicutes	Paenibacillaceae	unclassified
	Proteobacteria	A0839	A0839
	Actinobacteria	Nocardiaceae	Rhodococcus
	Bacteroidetes	Porphyromonadaceae	Porphyromonas
	Spirochaetes	Spirochaetaceae	Spirochaeta
OTUs specific to female crops	Actinobacteria	Nocardioidaceae	Marmoricola
	Firmicutes	Listeriaceae	Listeria
	Proteobacteria	Enterobacteriaceae	Escherichia-Shigella
	Chlamydiae	Parachlamydiaceae	unclassified
	Bacteroidetes	Chitinophagaceae	unclassified
	Actinobacteria	67-14	67-14
	Actinobacteria	Nocardioidaceae	Nocardioides
	unclassified	unclassified	unclassified
	Actinobacteria	unclassified	unclassified
	Proteobacteria	0319-6G20	0319-6G20
	Proteobacteria	Pseudomonadaceae	Thiopseudomonas
	Firmicutes	Ruminococcaceae	Ruminococcaceae
	Actinobacteria	Bifidobacteriaceae	Bifidobacterium
	Actinobacteria	67-14	67-14
	Actinobacteria	Micrococcaceae	Rothia
	Bacteroidetes	OPB56	fa_OPB56
	Actinobacteria	Nocardiopsaceae	Thermobifida
	Actinobacteria	Nocardioidaceae	Nocardioides
	Firmicutes	Paenibacillaceae	unclassified
	Actinobacteria	Microbacteriaceae	Clavibacter
	Proteobacteria	SM2D12	SM2D12
	Proteobacteria	Burkholderiaceae	unclassified
	Bacteroidetes	Chitinophagaceae	Flavisolibacter
	Bacteroidetes	Rikenellaceae	Rikenellaceae_RC9
	Firmicutes	unclassified	unclassified
	Epsilonbacteraeota	Arcobacteraceae	Arcobacter
	Proteobacteria	Burkholderiaceae	unclassified
	Proteobacteria	Burkholderiaceae	unclassified
	Proteobacteria	Rhodobacteraceae	unclassified
	unclassified	unclassified	unclassified
	Proteobacteria	Rhizobiaceae	unclassified
	Bacteroidetes	Sphingobacteriaceae	Mucilaginibacter
	Bacteroidetes	unclassified	unclassified
	Proteobacteria	Burkholderiaceae	Undibacterium
	Proteobacteria	Methylophilaceae	MM2
	Proteobacteria	Halomonadaceae	Halomonas
	Proteobacteria	Rhizobiaceae	unclassified
	Proteobacteria	Methylophilaceae	Methylophilus
	Fusobacteria	Fusobacteriaceae	Fusobacterium
	Actinobacteria	Micrococcaceae	Kocuria
	Proteobacteria	Rhizobiaceae	Aureimonas
	Actinobacteria	Microbacteriaceae	unclassified
	Proteobacteria	Beijerinckiaceae	unclassified
	Proteobacteria	Sphingomonadaceae	unclassified
	Bacteroidetes	Spirosomaceae	unclassified
	Actinobacteria	Intrasporangiaceae	Ornithinimicrobium
	Bacteroidetes	Hymenobacteraceae	Hymenobacter
	Bacteroidetes	Prevotellaceae	unclassified
	Actinobacteria	Intrasporangiaceae	Knoellia
	Bacteroidetes	Sphingobacteriaceae	Pedobacter
	Actinobacteria	Streptomycetaceae	Streptomyces
	Proteobacteria	Pseudoalteromonadaceae	Pseudoalteromonas
	Firmicutes	unclassified	unclassified
	Proteobacteria	Rhodocyclaceae	unclassified
	Firmicutes	Paenibacillaceae	Ammoniphilus
	Proteobacteria	Aeromonadaceae	Tolumonas
	Actinobacteria	uncultured	uncultured
	Proteobacteria	0319-6G20	0319-6G20
	Proteobacteria	Burkholderiaceae	Simplicispira
	Proteobacteria	Sphingomonadaceae	Novosphingobium
	Bacteroidetes	Spirosomaceae	Spirosoma
	unclassified	unclassified	unclassified
	Actinobacteria	Corynebacteriaceae	unclassified
	Actinobacteria	Micrococcaceae	Kocuria
	Bacteroidetes	Hymenobacteraceae	Hymenobacter
	Proteobacteria	Pseudomonadaceae	Pseudomonas
	Proteobacteria	Xanthomonadaceae	unclassified
	Firmicutes	unclassified	unclassified
	Proteobacteria	Xanthobacteraceae	uncultured
OTUs specific to male crops	Bacteroidetes	Flavobacteriaceae	unclassified
	Proteobacteria	Shewanellaceae	Shewanella
	Actinobacteria	IMCC26256	fa_IMCC26256
	Proteobacteria	Acetobacteraceae	Craurococcus
	Proteobacteria	Burkholderiaceae	Duganella
	Actinobacteria	Corynebacteriaceae	Corynebacterium
	Firmicutes	Caldicoprobacteraceae	Caldicoprobacter
	Bacteroidetes	Bacteroidaceae	Bacteroides
	Bacteroidetes	Chitinophagaceae	Taibaiella
	Firmicutes	Lachnospiraceae	unclassified
	Firmicutes	Ruminococcaceae	Ruminococcaceae_UCG-014
	Bacteroidetes	Spirosomaceae	Dyadobacter
	Proteobacteria	Rhodobacteraceae	Paracoccus
	Bacteroidetes	Microscillaceae	uncultured
	Firmicutes	Aerococcaceae	Abiotrophia
	Bacteroidetes	Paludibacteraceae	uncultured
	Proteobacteria	Sphingomonadaceae	Sphingomonas
	Actinobacteria	Sporichthyaceae	Sporichthya
	Bacteroidetes	Bacteroidaceae	Bacteroides
	Gemmatimonadetes	Gemmatimonadaceae	unclassified
	Actinobacteria	Iamiaceae	Iamia
	Fibrobacteres	Fibrobacteraceae	unclassified
	Actinobacteria	Micrococcaceae	unclassified
	Actinobacteria	Nocardioidaceae	Nocardioides
	Firmicutes	Planococcaceae	Lysinibacillus
	Actinobacteria	unclassified	unclassified
	Proteobacteria	Rhodobacteraceae	Paracoccus
	Actinobacteria	Corynebacteriaceae	Corynebacterium
	Proteobacteria	Acetobacteraceae	Craurococcus
	Actinobacteria	unclassified	unclassified
	Proteobacteria	Burkholderiaceae	unclassified
	Chlamydiae	Simkaniaceae	Ga0074140
	Actinobacteria	Intrasporangiaceae	unclassified
	Bacteroidetes	Flavobacteriaceae	Flavobacterium
	Actinobacteria	Brevibacteriaceae	Brevibacterium
	Proteobacteria	Xanthomonadaceae	Thermomonas
	Bacteroidetes	Rikenellaceae	uncultured
	Firmicutes	FamilyXI	Anaerococcus
	Actinobacteria	Microbacteriaceae	unclassified
	Proteobacteria	Burkholderiaceae	Massilia
	Firmicutes	FamilyXI	Anaerococcus
	Firmicutes	Bacillaceae	unclassified
	Proteobacteria	unclassified	unclassified
	Actinobacteria	uncultured	uncultured
	Proteobacteria	Acetobacteraceae	Roseomonas
	Actinobacteria	Nocardioidaceae	Nocardioides
	Actinobacteria	uncultured	uncultured
	Verrucomicrobia	Pedosphaeraceae	Pedosphaeraceae
	Proteobacteria	Burkholderiaceae	unclassified
	Firmicutes	Carnobacteriaceae	Atopostipes
	Bacteroidetes	Chitinophagaceae	uncultured
	Proteobacteria	Beijerinckiaceae	Methylobacterium
	Chlamydiae	cvE6	cvE6
	Actinobacteria	Microbacteriaceae	Leucobacter
	Proteobacteria	Rhizobiaceae	unclassified
	Actinobacteria	Micrococcaceae	Kocuria
	Actinobacteria	Geodermatophilaceae	unclassified
	Firmicutes	Lachnospiraceae	unclassified
	Proteobacteria	unclassified	unclassified
	Bacteroidetes	Flavobacteriaceae	Flavobacterium
	Bacteroidetes	Weeksellaceae	Chryseobacterium
	Actinobacteria	Corynebacteriaceae	Corynebacterium
	Actinobacteria	Rubrobacteriaceae	Rubrobacter
	Firmicutes	Bacillaceae	Anoxybacillus
	Firmicutes	Streptococcaceae	Streptococcus
	Gemmatimonadetes	Longimicrobiaceae	Longimicrobiaceae
	Acidobacteria	Solibacteraceae	Bryobacter
	Bacteroidetes	Hymenobacteraceae	Hymenobacter
	Proteobacteria	Burkholderiaceae	unclassified
	Actinobacteria	Geodermatophilaceae	Modestobacter
	Proteobacteria	Geobacteraceae	Geobacter
	Proteobacteria	Rhodospirillaceae	uncultured
	Proteobacteria	Sphingomonadaceae	unclassified
	Bacteroidetes	Prevotellaceae	Prevotella
	Proteobacteria	Archangiaceae	unclassified
	Bacteroidetes	Weeksellaceae	Moheibacter
	Actinobacteria	Nocardiaceae	Nocardia
	Proteobacteria	Sphingomonadaceae	Sphingomonas
	Bacteroidetes	Marinilabiliaceae	unclassified
	Firmicutes	Planococcaceae	unclassified
	Actinobacteria	Solirubrobacteraceae	unclassified
	Actinobacteria	Streptomycetaceae	Streptomyces
OTUs specific to female guts	Proteobacteria	Burkholderiaceae	unclassified
	Proteobacteria	Haliangiaceae	Haliangium
	Actinobacteria	uncultured	uncultured
	Proteobacteria	SAR324	SAR324
	Actinobacteria	Corynebacteriaceae	Corynebacterium
	Proteobacteria	unclassified	unclassified
	Actinobacteria	uncultured	uncultured
	Actinobacteria	Corynebacteriaceae	unclassified
	Proteobacteria	unclassified	unclassified
	Proteobacteria	Xanthobacteraceae	uncultured
	Actinobacteria	uncultured	uncultured
	Proteobacteria	Caulobacteraceae	Phenylobacterium
	Actinobacteria	Ilumatobacteraceae	unclassified
	Proteobacteria	Burkholderiaceae	unclassified
	Proteobacteria	Sphingomonadaceae	Novosphingobium
	Proteobacteria	Beijerinckiaceae	Methylobacterium
	Proteobacteria	Rhizobiales	Bauldia
	Proteobacteria	Legionellaceae	unclassified
	Armatimonadetes	Fimbriimonadaceae	Fimbriimonadaceae
	Proteobacteria	mle1-27	mle1-27
	Proteobacteria	Burkholderiaceae	unclassified
	Actinobacteria	Microbacteriaceae	unclassified
	Gemmatimonadetes	Gemmatimonadaceae	uncultured
	Bacteroidetes	Chitinophagaceae	Ferruginibacter
	Proteobacteria	Devosiaceae	Devosia
	Bacteroidetes	Weeksellaceae	Chryseobacterium
	Proteobacteria	Enterobacteriaceae	unclassified
	Proteobacteria	Rhizobiales	Bauldia
	Proteobacteria	Pasteurellaceae	unclassified
	Firmicutes	Ruminococcaceae	unclassified
	Bacteroidetes	unclassified	unclassified
	Bacteroidetes	Chitinophagaceae	unclassified
	Bacteroidetes	Chitinophagaceae	Sediminibacterium
	Proteobacteria	Moraxellaceae	Acinetobacter
	Proteobacteria	Dongiaceae	Dongia
	Proteobacteria	Sphingomonadaceae	Sphingobium
	Firmicutes	Bacillaceae	Geobacillus
	Proteobacteria	unclassified	unclassified
	Actinobacteria	Nakamurellaceae	Nakamurella
	Actinobacteria	Mycobacteriaceae	Mycobacterium
	Bacteroidetes	Microscillaceae	uncultured
	Bacteroidetes	Microscillaceae	uncultured
	Gemmatimonadetes	Gemmatimonadaceae	Gemmatimonas
	Proteobacteria	BIrii41	BIrii41
	Proteobacteria	unclassified	unclassified
	Proteobacteria	uncultured	uncultured
	Proteobacteria	uncultured	fa
	Actinobacteria	Microbacteriaceae	Lysinimonas
	Firmicutes	Peptococcaceae	unclassified
	Proteobacteria	Nannocystaceae	Nannocystis
	Proteobacteria	Sphingomonadaceae	Novosphingobium
	Proteobacteria	Sphingomonadaceae	Sphingobium
	Actinobacteria	Microbacteriaceae	Leucobacter
	Proteobacteria	CCD24	fa_CCD24
	Proteobacteria	Neisseriaceae	Conchiformibius
	Bacteroidetes	Sphingobacteriaceae	Mucilaginibacter
	Actinobacteria	unclassified	unclassified
	Gemmatimonadetes	Gemmatimonadaceae	Gemmatimonas
	Proteobacteria	uncultured	fa
	Proteobacteria	Rhodocyclaceae	Methyloversatilis
	Bacteroidetes	Chitinophagaceae	unclassified
	Proteobacteria	Azospirillaceae	Azospirillum
	Actinobacteria	Micromonosporaceae	unclassified
	Proteobacteria	Xanthobacteraceae	Pseudolabrys
	Proteobacteria	Caulobacteraceae	uncultured
	Proteobacteria	SC-I-84	SC-I-84
	Proteobacteria	Rhodobacteraceae	Rubellimicrobium
	Proteobacteria	Acetobacteraceae	unclassified
	Bacteroidetes	Microscillaceae	uncultured
	Proteobacteria	Nitrosomonadaceae	IS-44
	Firmicutes	Clostridiaceae	Clostridium
	Bacteroidetes	Chitinophagaceae	uncultured
	Actinobacteria	unclassified	unclassified
	Firmicutes	Bacillaceae	Bacillus
	Firmicutes	FamilyXII	Exiguobacterium
	Proteobacteria	Hyphomicrobiaceae	Pedomicrobium
	Proteobacteria	Azospirillaceae	Skermanella
	Verrucomicrobia	Pedosphaeraceae	Pedosphaeraceae
	Proteobacteria	Sphingomonadaceae	Sphingobium
	Proteobacteria	Micropepsaceae	Micropepsis
	Actinobacteria	Corynebacteriaceae	Corynebacterium
	Proteobacteria	TRA3-20	TRA3-20
	Proteobacteria	Xanthobacteraceae	Pseudolabrys
	Proteobacteria	Sphingomonadaceae	Sphingomonas
	Proteobacteria	Burkholderiaceae	unclassified
	Proteobacteria	SC-I-84	SC-I-84
	Proteobacteria	uncultured	uncultured
	Proteobacteria	Devosiaceae	Devosia
	Actinobacteria	Streptomycetaceae	Streptomyces
	Proteobacteria	Hyphomicrobiaceae	Pedomicrobium
	Chlamydiae	cvE6	cvE6
	Proteobacteria	Hyphomicrobiaceae	Hyphomicrobium
	Proteobacteria	unclassified	unclassified
	Proteobacteria	Hyphomonadaceae	Hirschia
	Proteobacteria	Azospirillaceae	Azospirillum
	Proteobacteria	Xanthomonadaceae	Lysobacter
	Proteobacteria	Burkholderiaceae	unclassified
	Actinobacteria	Thermomonosporaceae	Actinomadura
	Proteobacteria	Rhodobacteraceae	Amaricoccus
	Proteobacteria	Rhodobacteraceae	unclassified
	Proteobacteria	Sphingomonadaceae	Altererythrobacter
	Proteobacteria	Micropepsaceae	uncultured
	Bacteroidetes	Microscillaceae	Ohtaekwangia
	Proteobacteria	Sphingomonadaceae	Sphingobium
	Proteobacteria	uncultured	uncultured
	Proteobacteria	Hyphomonadaceae	SWB02
	Bacteroidetes	AKYH767	AKYH767
	Bacteroidetes	Flavobacteriaceae	Flavobacterium
	Proteobacteria	Azospirillaceae	Skermanella
	Proteobacteria	Magnetospiraceae	uncultured
	Actinobacteria	unclassified	unclassified
	Bacteroidetes	Chitinophagaceae	Terrimonas
	Proteobacteria	BIrii41	BIrii41
	Actinobacteria	Bifidobacteriaceae	Bifidobacterium
	Proteobacteria	Devosiaceae	Devosia
	Bacteroidetes	Flavobacteriaceae	unclassified
	Proteobacteria	Rhizobiales	Incertae
	Bacteroidetes	Chitinophagaceae	unclassified
	Proteobacteria	Micropepsaceae	uncultured
	Proteobacteria	Nitrosomonadaceae	IS-44
	Proteobacteria	Devosiaceae	Devosia
	Firmicutes	Bacillaceae	Anoxybacillus
	unclassified	unclassified	unclassified
	Gemmatimonadetes	Gemmatimonadaceae	uncultured
	Proteobacteria	Rhizobiales	Incertae
	Acidobacteria	Solibacteraceae	Bryobacter
	Firmicutes	Streptococcaceae	Streptococcus
	Proteobacteria	SC-I-84	SC-I-84
	Actinobacteria	unclassified	unclassified
	Proteobacteria	Rhodobacteraceae	unclassified
	Proteobacteria	Sphingomonadaceae	Novosphingobium
	Proteobacteria	BIrii41	BIrii41
	Bacteroidetes	Weeksellaceae	Chryseobacterium
	Proteobacteria	Dongiaceae	Dongia
	Firmicutes	Bacillaceae	Fictibacillus
	Bacteroidetes	Microscillaceae	uncultured
	Proteobacteria	Rhodocyclaceae	Dechloromonas
	Proteobacteria	uncultured	uncultured
	Proteobacteria	Xanthobacteraceae	Xanthobacteraceae
	Firmicutes	Staphylococcaceae	Staphylococcus
	Proteobacteria	Unknown_Family	Acidibacter
	Actinobacteria	Intrasporangiaceae	unclassified
	Actinobacteria	Microbacteriaceae	Pseudoclavibacter
	Bacteroidetes	Chitinophagaceae	Ferruginibacter
	Firmicutes	Ruminococcaceae	unclassified
	Actinobacteria	Nocardioidaceae	Nocardioides
	Proteobacteria	Micropepsaceae	uncultured
	Proteobacteria	Xanthobacteraceae	Pseudolabrys
	Proteobacteria	Micropepsaceae	Rhizomicrobium
	Proteobacteria	R7C24	R7C24
	Proteobacteria	unclassified	unclassified
	Proteobacteria	Beijerinckiaceae	Methylobacterium
	Proteobacteria	Xanthobacteraceae	Pseudolabrys
	Bacteroidetes	NS9	marine_group_NS9
	Proteobacteria	BIrii41	BIrii41
	Firmicutes	Bacillaceae	Caldalkalibacillus
	Gemmatimonadetes	Gemmatimonadaceae	uncultured
	Proteobacteria	Sphingomonadaceae	Sphingopyxis
	Firmicutes	unclassified	unclassified
	Bacteroidetes	Chitinophagaceae	unclassified
	Bacteroidetes	Microscillaceae	uncultured
	Actinobacteria	IMCC26256	fa_IMCC26256
	Proteobacteria	Xanthobacteraceae	unclassified
	Proteobacteria	Sphingomonadaceae	unclassified
	Firmicutes	Aerococcaceae	Aerococcus
	Proteobacteria	Burkholderiaceae	unclassified
	Firmicutes	Lactobacillaceae	Lactobacillus
OTUs specific to male guts	Firmicutes	Bacillaceae	Bacillus
	Actinobacteria	Nocardioidaceae	Nocardioides
	Proteobacteria	Acetobacteraceae	unclassified
	Proteobacteria	Idiomarinaceae	Idiomarina
	Actinobacteria	Micromonosporaceae	Micromonospora
	Proteobacteria	Acetobacteraceae	Acidiphilium
	Firmicutes	Streptococcaceae	Streptococcus
	Bacteroidetes	Chitinophagaceae	unclassified
	Proteobacteria	Enterobacteriaceae	unclassified
	Gemmatimonadetes	Gemmatimonadaceae	unclassified
	Bacteroidetes	Chitinophagaceae	uncultured
	Proteobacteria	Solimonadaceae	Nevskia
	Proteobacteria	Rhizobiaceae	Aureimonas
	Proteobacteria	Diplorickettsiaceae	Aquicella
	Bacteroidetes	Flavobacteriaceae	Flavobacterium
	Firmicutes	Thermoactinomycetaceae	Hazenella
	Proteobacteria	Beijerinckiaceae	Methylobacterium
	Firmicutes	Lachnospiraceae	unclassified
	Bacteroidetes	Chitinophagaceae	unclassified
	Proteobacteria	Acetobacteraceae	Roseomonas
	Bacteroidetes	Chitinophagaceae	unclassified
	Proteobacteria	Sphingomonadaceae	unclassified
	Acidobacteria	Holophagaceae	Geothrix
	Proteobacteria	Acetobacteraceae	Rubritepida
	Proteobacteria	Burkholderiaceae	Azohydromonas
	Bacteroidetes	Spirosomaceae	unclassified
	Proteobacteria	P3OB-42	P3OB-42
	Proteobacteria	Acetobacteraceae	uncultured
	Actinobacteria	Nakamurellaceae	Nakamurella
	Bacteroidetes	Chitinophagaceae	uncultured
	Proteobacteria	Rhizobiaceae	Allorhizobium-Neorhizobium-Pararhizobium-Rhizobium
	Firmicutes	Bacillaceae	Anoxybacillus
	Bacteroidetes	Chitinophagaceae	Ferruginibacter
	Chlamydiae	Simkaniaceae	unclassified
	Proteobacteria	Sphingomonadaceae	unclassified
	FBP	FBP	fa_FBP
	Proteobacteria	Hyphomonadaceae	unclassified
	Proteobacteria	Acetobacteraceae	Roseomonas
	Proteobacteria	Hyphomicrobiaceae	Pedomicrobium
	Proteobacteria	Rhizobiaceae	unclassified
	Proteobacteria	Burkholderiaceae	Achromobacter
	Proteobacteria	Cellvibrionaceae	Cellvibrio
	Proteobacteria	Sphingomonadaceae	unclassified
	Proteobacteria	Burkholderiaceae	Janthinobacterium
	Proteobacteria	Sphingomonadaceae	Sphingobium
	Proteobacteria	Rhizobiaceae	unclassified
	Proteobacteria	unclassified	unclassified
	Bacteroidetes	Dysgonomonadaceae	Dysgonomonas
	Proteobacteria	Idiomarinaceae	unclassified
	Proteobacteria	Rhodobacteraceae	Rubellimicrobium
	Proteobacteria	Desulfarculaceae	uncultured
	Proteobacteria	Beijerinckiaceae	unclassified
	Firmicutes	Veillonellaceae	Dialister
	Bacteroidetes	unclassified	unclassified
	Proteobacteria	Acetobacteraceae	Roseomonas
	Firmicutes	Ruminococcaceae	Ruminococcus
	Proteobacteria	Sphingomonadaceae	unclassified
	Actinobacteria	Kineosporiaceae	Angustibacter
	Bacteroidetes	Hymenobacteraceae	Hymenobacter
	Gemmatimonadetes	S0134	terrestrial_group_S0134
	Proteobacteria	Rhodocyclaceae	Azoarcus
	Actinobacteria	Pseudonocardiaceae	Actinomycetospora

## Sheet: Fungi
Common or specific OTUs	Phylum	Family	Genus
Common OTUs between all samples	Basidiomycota	unclassified	Malasseziales
	Ascomycota	Davidiellaceae	Cladosporium
	Ascomycota	Davidiellaceae	Cladosporium
	Ascomycota	Davidiellaceae	Cladosporium
	Ascomycota	unclassified	unclassified
	Ascomycota	unclassified	unclassified
	Ascomycota	Nectriaceae	unclassified
	unclassified	unclassified	unclassified
	Ascomycota	Pleosporaceae	unclassified
	Basidiomycota	Microstromataceae	Microstroma
	Ascomycota	unclassified	unclassified
	Ascomycota	Trichocomaceae	Penicillium
	Basidiomycota	Malasseziaceae	Malassezia
	Basidiomycota	Tremellales	Cryptococcus
	Ascomycota	unclassified	unclassified
	Ascomycota	Cordycipitaceae	Engyodontium
	Ascomycota	Sclerotiniaceae	unclassified
	Ascomycota	Saccharomycetaceae	Saccharomyces
	Ascomycota	Dothioraceae	Aureobasidium
Common OTUs between female crops, female guts and male crops	Basidiomycota	Tremellales	Bulleromyces
	Ascomycota	Trichocomaceae	Penicillium
	Ascomycota	Helotiales	unclassified
Common OTUs between crops and guts of males	Ascomycota	Leptosphaeriaceae	unclassified
	Basidiomycota	Schizoporaceae	Xylodon
	Ascomycota	Saccharomycetales	Debaryomyces
	Basidiomycota	Malasseziaceae	Malassezia
	Basidiomycota	Phanerochaetaceae	Ceriporia
	Ascomycota	Pleosporales	unclassified
	Ascomycota	unclassified	unclassified
Common OTUs between female crops, female guts and male guts	Ascomycota	Davidiellaceae	Cladosporium
	Basidiomycota	Wallemiaceae	Wallemia
	Basidiomycota	Fomitopsidaceae	Laetiporus
	Basidiomycota	Malasseziaceae	Malassezia
	Ascomycota	Hypocreaceae	Trichoderma
	Basidiomycota	Typhulaceae	unclassified
Common OTUs between female guts, male crops and male guts	Ascomycota	Erysiphaceae	Golovinomyces
	Ascomycota	Davidiellaceae	Cladosporium
	Ascomycota	Phaeosphaeriaceae	Parastagonospora
	Basidiomycota	Filobasidiaceae	Filobasidium
Common OTUs between crops of females and males	Ascomycota	Leptosphaeriaceae	unclassified
	Basidiomycota	unclassified	Entylomatales
	unclassified	unclassified	unclassified
	Ascomycota	Dothideomycetes	Leptospora
	unclassified	unclassified	unclassified
	Ascomycota	Botryosphaeriaceae	Lasiodiplodia
	Basidiomycota	Schizoporaceae	Hyphodontia
	Ascomycota	unclassified	unclassified
	Ascomycota	Chaetothyriales	Coniosporium
	Basidiomycota	Malasseziaceae	Malassezia
	Ascomycota	Amphisphaeriaceae	Bartalinia
	unclassified	unclassified	unclassified
	Ascomycota	Erysiphaceae	Erysiphe
	Basidiomycota	unclassified	unclassified
	Basidiomycota	Malasseziaceae	Malassezia
	Basidiomycota	Polyporaceae	Perenniporia
	unclassified	unclassified	unclassified
Common OTUs between guts of females and males	Ascomycota	Pleosporales	Periconia
	Basidiomycota	Malasseziaceae	Malassezia
	Basidiomycota	Meruliaceae	Phlebia
	Basidiomycota	Malasseziaceae	Malassezia
	Basidiomycota	Phanerochaetaceae	Hyphodermella
	Basidiomycota	Malasseziaceae	Malassezia
	Ascomycota	unclassified	unclassified
	Ascomycota	Pleosporales	Periconia
	Basidiomycota	Microbotryomycetes	Glaciozyma
	Basidiomycota	Ganodermataceae	Ganoderma
Common OTUs female crops and male guts	Ascomycota	Davidiellaceae	Cladosporium
	Ascomycota	Erysiphaceae	Blumeria
	Ascomycota	Diatrypaceae	unclassified
	Ascomycota	Nectriaceae	Fusarium
	Basidiomycota	unclassified	unclassified
	Ascomycota	Metschnikowiaceae	Clavispora
	Basidiomycota	Tremellales	Cryptococcus
Common OTUs between female guts and male crops	unclassified	unclassified	unclassified
	Basidiomycota	Corticiaceae	Vuilleminia
	unclassified	unclassified	unclassified
Common OTUs between crops and guts of males	Ascomycota	Hypocreales	Myrothecium
	Ascomycota	Cucurbitariaceae	Pyrenochaetopsis
	Ascomycota	Dothideomycetes	Zymoseptoria
	Basidiomycota	Polyporaceae	Neofavolus
	Ascomycota	Nectriaceae	Gibberella
	Ascomycota	Phaeosphaeriaceae	Phaeosphaeria
	Basidiomycota	Holtermanniales	Holtermanniella
	Basidiomycota	Ganodermataceae	Ganoderma
	Ascomycota	Microascaceae	Microascus
	Basidiomycota	Meruliaceae	Phlebia
	Basidiomycota	Schizoporaceae	Xylodon
	Ascomycota	Pleosporales	Periconia
	Ascomycota	unclassified	unclassified
	Basidiomycota	Filobasidiaceae	Filobasidium
Common OTUs between guts of males and females	Basidiomycota	Hymenochaetaceae	Fuscoporia
	Ascomycota	unclassified	unclassified
	Ascomycota	Pseudeurotiaceae	unclassified
	Ascomycota	Morchellaceae	Verpa
	Basidiomycota	Peniophoraceae	Peniophora
	Ascomycota	unclassified	unclassified
	unclassified	unclassified	unclassified
	Ascomycota	Trichocomaceae	Aspergillus
Specific OTUs to female crops	Ascomycota	unclassified	unclassified
	Ascomycota	Chaetomiaceae	Mycothermus
	Basidiomycota	Corticiaceae	unclassified
	Basidiomycota	Peniophoraceae	Peniophora
	Ascomycota	unclassified	unclassified
	Basidiomycota	Peniophoraceae	Peniophora
	unclassified	unclassified	unclassified
	Ascomycota	Mycosphaerellaceae	Dissoconium
	Ascomycota	unclassified	unclassified
	unclassified	unclassified	unclassified
	Ascomycota	Saccharomycetales	Candida
	Ascomycota	Sordariaceae	unclassified
	Basidiomycota	Schizoporaceae	Schizopora
	Basidiomycota	unclassified	unclassified
	Ascomycota	unclassified	unclassified
	Ascomycota	Hypocreales	Sarocladium
	Ascomycota	unclassified	unclassified
	Basidiomycota	Stereaceae	Stereum
	Ascomycota	Pleosporaceae	Alternaria
	Basidiomycota	Malasseziaceae	Malassezia
	Ascomycota	Teloschistaceae	unclassified
	unclassified	unclassified	unclassified
	Ascomycota	Mycosphaerellaceae	Sphaerulina
	Basidiomycota	Malasseziaceae	Malassezia
	Ascomycota	unclassified	unclassified
	unclassified	unclassified	unclassified
	Basidiomycota	Cystobasidiaceae	Cystobasidium
	Basidiomycota	unclassified	unclassified
	Ascomycota	unclassified	unclassified
	Ascomycota	unclassified	unclassified
	Basidiomycota	Sporidiobolales	Sporobolomyces
Specific OTUs to male crops	Ascomycota	Saccharomycetales	Candida
	Ascomycota	unclassified	unclassified
	Basidiomycota	Peniophoraceae	unclassified
	Basidiomycota	Bondarzewiaceae	Heterobasidion
	unclassified	unclassified	unclassified
	Ascomycota	Pleosporales	Periconia
	Ascomycota	Trichocomaceae	Aspergillus
	Basidiomycota	Pucciniaceae	Puccinia
	unclassified	unclassified	unclassified
	Basidiomycota	Holtermanniales	Holtermanniella
	Ascomycota	Herpotrichiellaceae	Phaeococcomyces
	Basidiomycota	Entolomataceae	Clitopilus
	Ascomycota	unclassified	unclassified
	Basidiomycota	Phanerochaetaceae	Phanerochaete
	Basidiomycota	Cystofilobasidiaceae	Itersonilia
	unclassified	unclassified	unclassified
	Zygomycota	Mucoraceae	Mucor
	Ascomycota	Pleosporales	Phoma
	Ascomycota	Pleosporaceae	Pyrenophora
	Basidiomycota	Polyporaceae	Trametes
	Ascomycota	Chaetothyriales	Coniosporium
	Basidiomycota	Polyporaceae	unclassified
	Ascomycota	Chaetothyriales	Bradymyces
	Basidiomycota	Paxillaceae	Paxillus
	unclassified	unclassified	unclassified
	Ascomycota	Pezizaceae	unclassified
	Basidiomycota	unclassified	unclassified
	Basidiomycota	Inocybaceae	Crepidotus
	Ascomycota	Helotiaceae	Cyathicula
	Basidiomycota	Tremellales	unclassified
	Basidiomycota	Hydnodontaceae	Brevicellicium
	Ascomycota	unclassified	unclassified
	unclassified	unclassified	unclassified
	Basidiomycota	Pleurotaceae	Pleurotus
	Ascomycota	unclassified	unclassified
Specific OTUs to female guts	Basidiomycota	Wallemiaceae	Wallemia
	Ascomycota	unclassified	unclassified
	Ascomycota	Trichocomaceae	Aspergillus
	Ascomycota	Pleosporales	unclassified
	Ascomycota	Chaetomiaceae	Humicola
	Ascomycota	Pleosporaceae	unclassified
	Ascomycota	Phaeosphaeriaceae	Phaeosphaeria
	Ascomycota	Phaeosphaeriaceae	Phaeosphaeria
	Basidiomycota	Malasseziaceae	Malassezia
	Basidiomycota	Inocybaceae	Crepidotus
	Ascomycota	Pezizomycotina	Dendrospora
	Ascomycota	Erysiphaceae	Neoerysiphe
	Ascomycota	Capnodiales	unclassified
	Basidiomycota	Ganodermataceae	Ganoderma
	Basidiomycota	Peniophoraceae	Duportella
	unclassified	unclassified	unclassified
	Ascomycota	unclassified	unclassified
	Ascomycota	Phaeosphaeriaceae	Phaeosphaeria
	unclassified	unclassified	unclassified
	Basidiomycota	Tremellales	Cryptococcus
	Basidiomycota	Entolomataceae	Clitopilus
	Ascomycota	Trichocomaceae	Penicillium
	Ascomycota	unclassified	unclassified
	Basidiomycota	Pleurotaceae	Hohenbuehelia
	Ascomycota	Trichocomaceae	Aspergillus
	Basidiomycota	Pluteaceae	Pluteus
	Basidiomycota	Lyophyllaceae	Ossicaulis
	Ascomycota	unclassified	unclassified
	Ascomycota	Trichocomaceae	Penicillium
	Basidiomycota	Ceratobasidiaceae	Ceratobasidium
	Ascomycota	Dothideaceae	Endoconidioma
	Ascomycota	Togniniaceae	Phaeoacremonium
	Ascomycota	Helotiaceae	Hymenoscyphus
	Basidiomycota	Malasseziaceae	Malassezia
	Basidiomycota	Schizoporaceae	Xylodon
	Basidiomycota	Polyporaceae	Lentinus
	Ascomycota	unclassified	unclassified
	Basidiomycota	Auriculariales	Exidia
	Ascomycota	unclassified	unclassified
	unclassified	unclassified	unclassified
	Ascomycota	Pleosporaceae	Chalastospora
	Ascomycota	Phaeosphaeriaceae	unclassified
	unclassified	unclassified	unclassified
	Ascomycota	unclassified	unclassified
	Ascomycota	Trichocomaceae	Talaromyces
	Ascomycota	Diatrypaceae	Eutypa
Specific OTUs to male guts	Basidiomycota	Xenasmataceae	Xenasmatella
	Ascomycota	Morchellaceae	Verpa
	Basidiomycota	Meruliaceae	Uncobasidium
	Ascomycota	Erysiphaceae	Neoerysiphe
	Ascomycota	unclassified	unclassified
	Ascomycota	Sordariomycetes	Myrmecridium
	Basidiomycota	Meruliaceae	Phlebia
	Ascomycota	Glomerellaceae	Colletotrichum
	Basidiomycota	unclassified	unclassified
	Ascomycota	unclassified	unclassified
	Basidiomycota	Trichosporonaceae	Trichosporon
	Ascomycota	Nectriaceae	Gibberella
	Basidiomycota	Fomitopsidaceae	Antrodia
	Ascomycota	unclassified	unclassified
	Ascomycota	unclassified	unclassified
	unclassified	unclassified	unclassified
	Ascomycota	unclassified	Pleosporales
	Ascomycota	unclassified	unclassified
	Ascomycota	Capnodiales	Capnobotryella
	unclassified	unclassified	unclassified
	Ascomycota	unclassified	unclassified
	Ascomycota	Taphrinaceae	Lalaria
	Basidiomycota	Cystobasidiaceae	Cystobasidium
	Basidiomycota	Peniophoraceae	unclassified
	unclassified	unclassified	unclassified
	Basidiomycota	Microstromataceae	Microstroma
	Basidiomycota	Polyporaceae	Neofavolus
	Basidiomycota	Strophariaceae	Agrocybe
	Basidiomycota	Symmetrosporaceae	Symmetrospora
	Ascomycota	unclassified	unclassified
	Basidiomycota	Tremellales	unclassified
	Basidiomycota	Trichosporonaceae	Trichosporon
	Ascomycota	unclassified	unclassified
	Basidiomycota	Phanerochaetaceae	Ceriporia
	Ascomycota	Xylariaceae	Hypoxylon
	Basidiomycota	Mycenaceae	Mycena
	Basidiomycota	Fomitopsidaceae	Pilatoporus
	Ascomycota	unclassified	unclassified
	Basidiomycota	Schizoporaceae	Schizopora
	Basidiomycota	Hydnaceae	Sistotrema
	Basidiomycota	Mycenaceae	Mycena
	Basidiomycota	unclassified	Tremellales
	Basidiomycota	Corticiaceae	unclassified
	Ascomycota	unclassified	unclassified
	Basidiomycota	Tremellales	Hannaella
	Ascomycota	Rhytismataceae	Rhytisma
	Basidiomycota	Meripilaceae	Rigidoporus
	Ascomycota	Saccharomycetales	Candida
	Basidiomycota	Tremellales	unclassified
	Basidiomycota	Marasmiaceae	Baeospora
	Basidiomycota	Sporidiobolales	Rhodotorula
